# Supplementary material for: The inflammatory response induced by Pseudomonas aeruginosa in macrophages enhances apoptotic cell removal
Source: PubMed Central journal article supplement (PMC7841155; doi:10.1038/s41598-021-81557-1), 2021-01-27
Supplement: 41598_2021_81557_MOESM1_ESM.pdf [file 41598_2021_81557_MOESM1_ESM.pdf]

## **Supplementary Info:**

### **The inflammatory response induced by *Pseudomonas aeruginosa* in macrophages enhances apoptotic cell removal**

Adriana Valeria Jäger \*†, Paula Arias †, Maria Virginia Tribulatti, Marcela Adriana Brocco, Maria Victoria Pepe, Arlinet Kierbel \*

Instituto de Investigaciones Biotecnológicas “Dr. R. Ugalde”, IIBIO, Universidad Nacional de San Martín (UNSAM), CONICET

† These authors contributed equally to this work.

\* These authors are co-senior authors.

Correspondence: A.V. Jäger and A. Kierbel, Instituto de Investigaciones Biotecnológicas (IIBIO), Universidad Nacional de San Martín, Buenos Aires B1650HMP, Argentina.

Correspondence: [avjager@gmail.com](mailto:avjager@gmail.com); [akierbel@iibintech.com.ar](mailto:akierbel@iibintech.com.ar)

**a**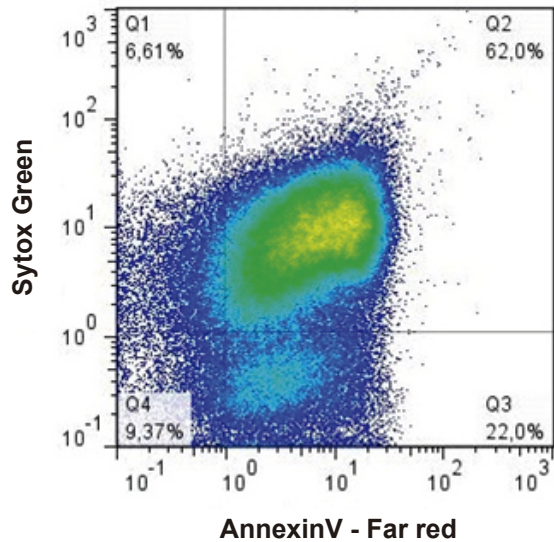**b**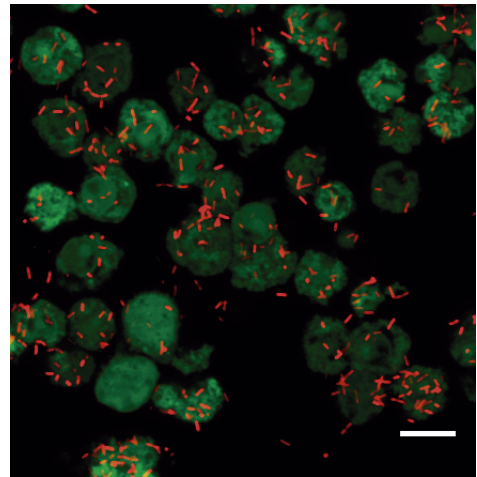**PAK-mCherry / CFSE-apoptotic cells**

**Supplementary Figure S1. *P. aeruginosa* adheres to J774 apoptotic cells.** **a.** Flow cytometry analysis of Annexin V-Sytox Green double staining of UV-treated J774 cells. On the flow cytometric scatter graph, the right upper quadrant represents our population of interest: the late apoptotic cells (Q2: 62%). The right lower quadrant represents the early apoptotic cells (Q3: 22%). **b.** Projected confocal Z-stack of apoptotic J774 co-incubated with bacteria for one hour. Almost all bacteria were found adhered to dead cells with few free bacteria remaining. Green: CFSE-labeled apoptotic cells. Red: PAK-mCherry.

a

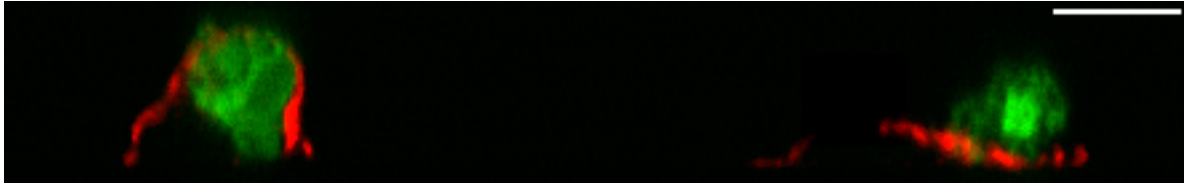

b

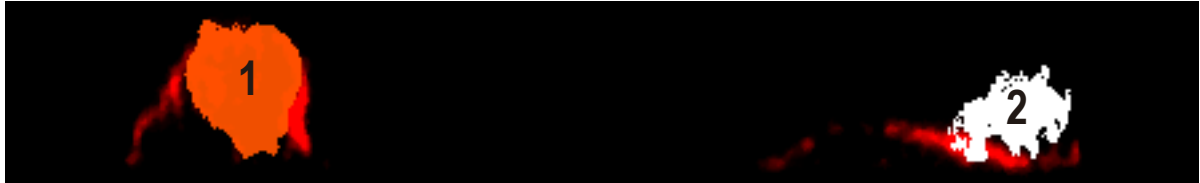

c

| Particle # | Volume ( $\mu\text{m}^3$ ) | Volume (voxels) | Position      |
|------------|----------------------------|-----------------|---------------|
| 1          | 44                         | 4705            | Intracellular |
| 2          | 26                         | 2846            | Extracellular |

**Supplementary Figure S2: Image analysis.** Representative image showing how the Object counter tool from ImageJ is used to evaluate the volume of BMDM-associated apoptotic cell material. **a.** CFSE-labeled apoptotic cells (green) associated with phalloidin-labeled cells (red). Scale bar: 10  $\mu\text{m}$ . **b.** “Object or particle map” rendered by the Object counter tool. **c.** A chart listing the volume (in voxels and  $\mu\text{m}^3$ ) of the particles. The localization (i.e. extracellular or intracellular) of apoptotic material was defined visually.

## J774

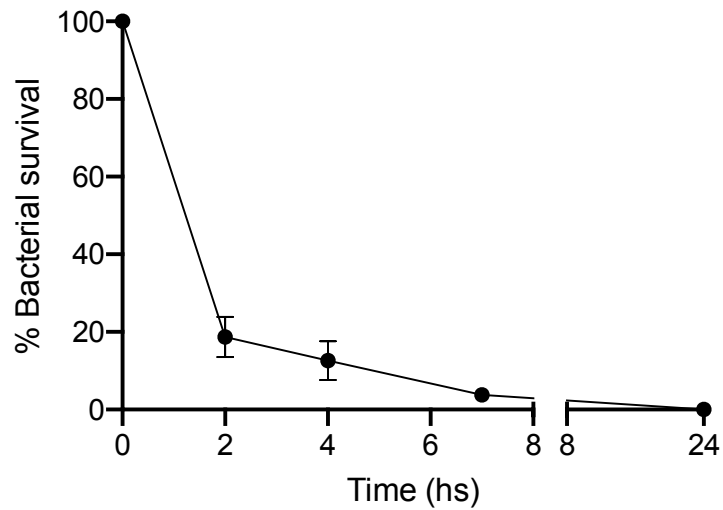

### **Supplementary Figure S3: *P. aeruginosa* is eliminated by J774 macrophage-like cell line.**

Intracellular bacterial survival over time was measured by standard antibiotic protection assays. J774 were infected with a MOI of 20 for 60 min, followed by 60 min of antibiotic treatment. Subsequently intracellular survival was determined by the CFU method at different time points. The mean of CFU  $\pm$  SEM was calculated. Data were normalized to time 0 (100%). Three independent experiments were performed.

**a**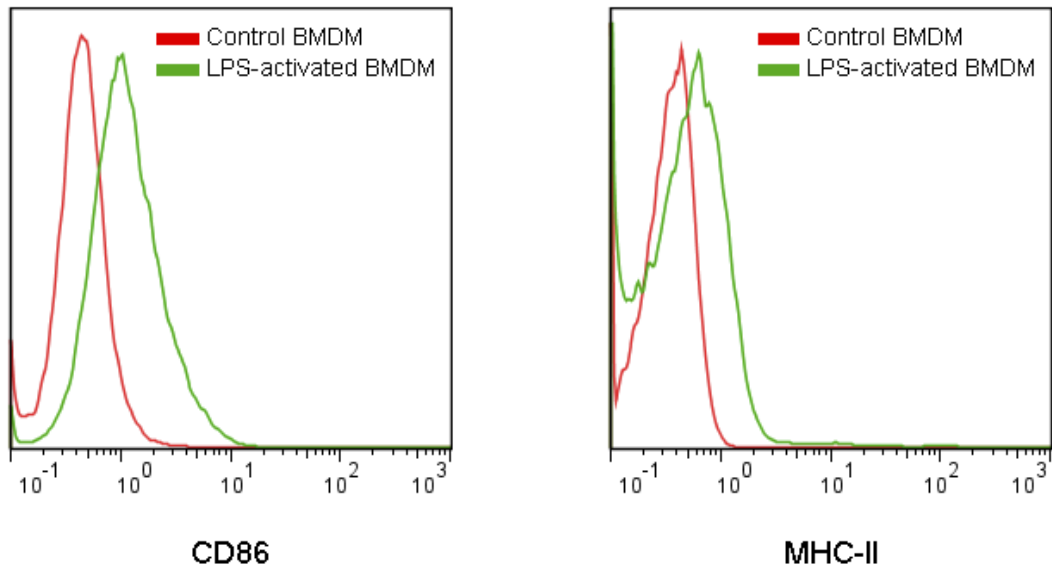**b**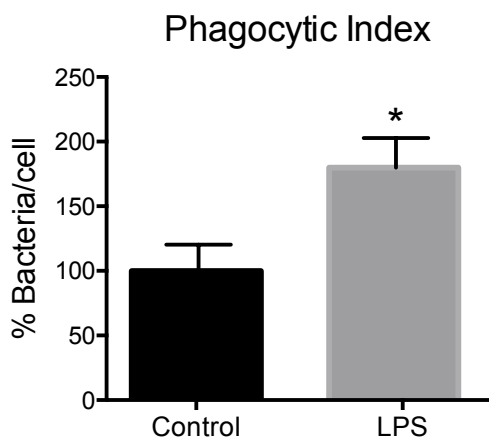**c**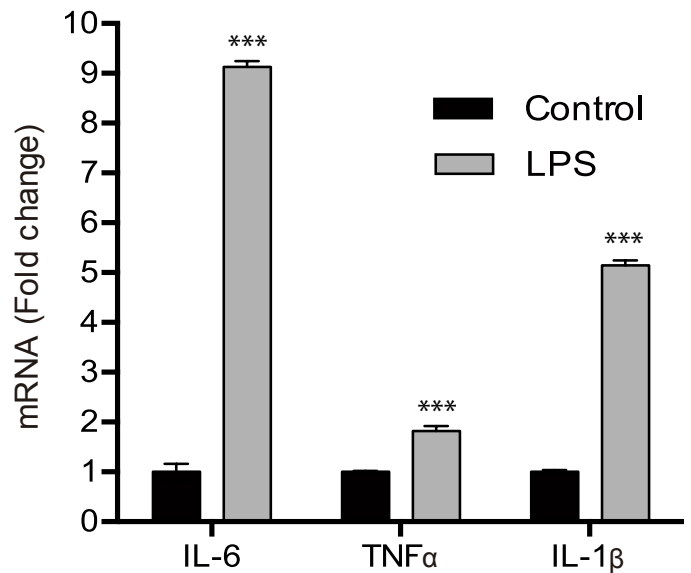

**Supplementary Figure S4: BMDM responsiveness to LPS inflammatory stimulus.** **a.** CD86 and MHC-II expression on BMDM surface after LPS-stimulation. BMDM were incubated for one hour with LPS (1  $\mu$ g/ml) or left untreated (Control) and surface molecule expression was determined by flow cytometry. Representative histogram plots are shown. **b.** BMDM Phagocytic Index is increased by LPS pre-stimulation. BMDM were incubated for 50 min with LPS (500 ng/ml) or left untreated (Control). The phagocytic capacities were checked 18 hours after pre-stimuli. Data were normalized to the Control (non-stimulus: 100%) and expressed as mean of bacteria/cell  $\pm$  SEM. \*  $p=0.0357$  vs. Control by unpaired  $t$ -test. **c.** Cytokine gene expression was determined in BMDM after stimulus with LPS and expressed as a fold change with respect to Control (non-stimulus). BMDM were incubated for 50 min with LPS (100 ng/ml) or left untreated (Control). Six hours after the initiation of the experiment, RNA was extracted. Three pro-inflammatory cytokines were tested by RT-qPCR: *Il-6*, *TNF $\alpha$*  and *Il-1 $\beta$* . Data are presented as mean Fold Change  $\pm$  SD and were normalized to *Ywhaz* mRNA levels. Reactions were run in triplicates. Significant differences were found for the three cytokines between LPS-treated and Control groups (\*\*\*)  $p \leq 0.0003$  by unpaired  $t$ -test).
